# Supplementary material for: Musculoskeletal conditions may increase the risk of chronic disease: a systematic review and meta-analysis of cohort studies
Source: BMC Med. 2018 Sep 25;16:167. doi: 10.1186/s12916-018-1151-2 (PMC6154805; doi:10.1186/s12916-018-1151-2)
Supplement: Supplementary file 2 — Excluded full texts and reasons for exclusion. (XLSX 34 kb) [file 12916_2018_1151_MOESM2_ESM.xlsx]

## Sheet: Excluded Full Texts
Title	Authors	Journal	Published	Reason for exclusion
The association of body weight, body fatness and body fat distribution with osteoarthritis of the knee: data from the Baltimore Longitudinal Study of Aging	Hochberg, M. C.; Lethbridge-Cejku, M.; Scott, W. W., Jr.; Reichle, R.; Plato, C. C.; Tobin, J. D.	Journal of Rheumatology	1995	Inappropriate design
Association of genetic and mechanical factors with age of onset of knee osteoarthritis. [Chinese]	Ji, J. F.; Dai, J.; Shi, D. Q.; Jiang, Q.	Chinese Journal of Medical Genetics	2010	Inappropriate design
Association of knee osteoarthritis with the accumulation of metabolic risk factors such as overweight, hypertension, dyslipidemia, and impaired glucose tolerance in Japanese men and women: the ROAD study	Yoshimura,Noriko; Muraki,Shigeyuki; Oka,Hiroyuki; Kawaguchi,Hiroshi; Nakamura,Kozo; Akune,Toru	Journal of Rheumatology	2011	Inappropriate design
Association of knee osteoarthritis, lumbar spondylosis and osteoporosis with metabolic syndrome: The road study	Yoshimura N.; Muraki S.; Oka H.; Kawaguchi H.; Nakamura K.; Akune T.	Osteoporosis International	2010	Inappropriate design
Back and neck pain exhibit many common features in old age: a population-based study of 4,486 Danish twins 70-102 years of age	Hartvigsen, J.; Christensen, K.; Frederiksen, H.	Spine	2004	Inappropriate design
Back pain remains a common symptom in old age. a population-based study of 4486 Danish twins aged 70-102	Hartvigsen, J.; Christensen, K.; Frederiksen, H.	European Spine Journal	2003	Inappropriate design
CHECK Cohort: Relationship between comorbidity and clinical status in early OA.	Wesseling,J.; Bierma-Zeinstra,S. M.; Dekker,J.; Gorter,K.; Roorda,L. D.; Bijlsma,J. W.	Osteoarthritis and Cartilage	2009	Inappropriate design
Comorbidity and health status in early osteoarthritis of hip and knee; CHECK cohort	Wesseling J.; Bierma-Zeinstra S.M.A.; Dekker J.; Gorter K.J.; Bijlsma J.W.J.	Arthritis and Rheumatism	2010	Inappropriate design
[Epidemiology of osteoarthritis in Japan : the ROAD study]	Yoshimura, N.	Clin Calcium	2011	Inappropriate design
OBESITY AND OSTEOARTHROSIS - A RETROSPECTIVE STUDY IN A SAUDI-ARABIAN PRIMARY HEALTH-CARE CENTER	Linder, B.; Binhemd, T.; Ahlberg, A.	Saudi Medical Journal	1991	Inappropriate design
The role of fat mass and skeletal muscle mass in knee osteoarthritis is different for men and women: the NEO study.	Visser AW.; de Mutsert R.; Loef M.; le Cessie S.; den Heijer M.; Bloem JL.; Reijnierse M.; Rosendaal FR.; Kloppenburg M.; .	Osteoarthritis and cartilage / OARS, Osteoarthritis Research Society	2014	Inappropriate design
Self-reported comorbidity and health status in early OA: The CHECK study.	Wesseling,J.; Bierma-Zeinstra,S. M.; Dekker,J.; Gorter,K. J.; Roorda,L. D.; Bijlsma,J. W.	Osteoarthritis and Cartilage	2010	Inappropriate design
Weight change in osteoarthritis	Abbate L.M.; Jordan J.M.	Osteoarthritis and Cartilage	2012	Inappropriate design
Association of body mass index with joint pain among community-dwelling women in Japan	Aoyagi, K.; Ross, P. D.; Okano, K.; Hayashi, T.; Moji, K.; Kusano, Y.; Takemoto, T. I.	Aging - Clinical and Experimental Research	2002	Inappropriate design
Risk factors for progression of knee osteoarthritis	Doherty, M.	Lancet	2001	Inappropriate design
OBESITY AND OSTEOARTHROSIS - A RETROSPECTIVE STUDY IN A SAUDI-ARABIA PRIMARY HEALTH-CARE CENTER	Osman, M. I.	Saudi Medical Journal	1992	Inappropriate design
Factors associated with radiographic osteoarthritis of the knee among community-dwelling Japanese women: the Hizen-Oshima Study.	Hashikawa T.; Osaki M.; Ye Z.; Tomita M.; Abe Y.; Honda S.; Takamura N.; Shindo H.; Aoyagi K.	Journal of orthopaedic science : official journal of the Japanese Orthopaedic Association	2011	Inappropriate design
Prevalence, Pattern and Impact of Musculoskeletal Disorders among Sewing Machine Operators in Surulere Local Government Area of Lagos State, Nigeria	Ak, Akodu; Ba, Tella; Adebisi, O. A.	Indian Journal of Physiotherapy & Occupational Therapy	2013	Inappropriate design
Prevalence and incidence of comorbidities in elderly women with ovarian cancer.	Chia VM.; O'Malley CD.; Danese MD.; Lindquist KJ.; Gleeson ML.; Kelsh MA.; Griffiths RI.	Gynecologic oncology	2013	Inappropriate design
Association of cartilage degeneration with four year weight gain--3T MRI data from the Osteoarthritis Initiative	Bucknor, M. D.; Nardo, L.; Joseph, G. B.; Alizai, H.; Srikhum, W.; Nevitt, M. C.; Lynch, J. A.; McCulloch, C. E.; Link, T. M.	Osteoarthritis & Cartilage	2015	Inappropriate population
Chronic back pain among the elderly: prevalence, associations, and predictors.	Jacobs JM.; Hammerman-Rozenberg R.; Cohen A.; Stessman J.	Spine	2006	Inappropriate population
Is lifelong knee joint force from work, home, and sport related to knee osteoarthritis?	Ratzlaff CR.; Koehoorn M.; Cibere J.; Kopec JA.	International journal of rheumatology	2012	Inappropriate population
A longitudinal study of knee pain in older men: Concord Health and Ageing in Men Project.	Fransen M.; Su S.; Harmer A.; Blyth FM.; Naganathan V.; Sambrook P.; Le Couteur D.; Cumming RG.	Age and ageing	2014	Inappropriate population
The relationship between body mass index across the life course and knee pain in adulthood: results from the 1958 birth cohort study.	Macfarlane GJ; de Silva V; Jones GT	Rheumatology	2011	Inappropriate population
Risk factors for cardiovascular disease and future osteoarthritis-related arthroplasty: a population-based cohort study in men and women from Malmo, Sweden	Kadam, U. T.; Holmberg, A.; Blagojevic, M.; Nilsson, P. M.; Akesson, K.	Scandinavian Journal of Rheumatology	2011	Inappropriate population
Serum lipids and low back pain: An association? - A follow-up study of a working population sample	Leino-Arjas, P.; Kaila-Kangas, L.; Solovieva, S.; Riihimaki, H.; Kirjonen, J.; Reunanen, A.	Spine	2006	Inappropriate population
Association between childhood overweight measures and adulthood knee pain, stiffness and dysfunction: a 25-year cohort study.	Antony B.; Jones G.; Venn A.; Cicuttini F.; March L.; Blizzard L.; Dwyer T.; Cross M.; Ding C.	Annals of the rheumatic diseases	2015	Inappropriate population
Longitudinal effects of physical inactivity and obesity on gait speed in older adults with frequent knee pain: data from the Osteoarthritis Initiative.	Bindawas SM.; Vennu V.	International journal of environmental research and public health	2015	Inappropriate population
Obesity and knee osteoarthritis. The Framingham Study.	Felson DT.; Anderson JJ.; Naimark A.; Walker AM.; Meenan RF.	Annals of internal medicine	1988	Inappropriate population
Weight change and the risk of total hip replacement	Flugsrud, G.B.; Nordsletten, L.; Espehaug, B.; Havelin, L.I.; Meyer, H.E.	Epidemiology	2003	Inappropriate population
Incidence of severe knee and hip osteoarthritis in relation to different measures of body mass: a population-based prospective cohort study.	Lohmander LS.; Gerhardsson de Verdier M.; Rollof J.; Nilsson PM.; EngstrÃ¶m G.	Annals of the rheumatic diseases	2009	Inappropriate population
Does obesity predict knee pain over fourteen years in women, independently of radiographic changes?	Goulston, L. M.; Kiran, A.; Javaid, M. K.; Soni, A.; White, K. M.; Hart, D. J.; Spector, T. D.; Arden, N. K.	Arthritis Care Res (Hoboken)	2011	Inappropriate population
All cause and disease specific mortality in patients with knee or hip osteoarthritis: population based cohort study.	NÃ¼esch E.; Dieppe P.; Reichenbach S.; Williams S.; Iff S.; JÃ¼ni P.	BMJ (Clinical research ed.)	2011	Inappropriate population
All-cause mortality and serious cardiovascular events in people with hip and knee osteoarthritis: A population based cohort study	Hawker, G. A.; Croxford, R.; Bierman, A. S.; Harvey, P. J.; Ravi, B.; Stanaitis, I.; Lipscombe, L. L.	PLoS ONE	2014	Inappropriate population
Arthritis as a risk factor for incident coronary heart disease in elderly Japanese-American males - the Honolulu Heart Program	Kishimoto, M.; Greenberg, J.; Lee, R.; Masaki, K. H.; Chen, R.; Rodriguez, B. L.; Blanchette, P.; Pillinger, M.; David Curb, J.	Bulletin of the NYU Hospital for Joint Diseases	2009	Inappropriate population
The Association Between Self-Reported Cardiovascular Disorders and Troublesome Neck Pain: A Population-Based Cohort Study	Nolet, Paul S.; CÃ´tÃ©, Pierre; Cassidy, J. David; Carroll, Linda J.	Journal of Manipulative & Physiological Therapeutics	2012	Inappropriate population
Association of atherosclerosis with presence and progression of osteoarthritis of the knee and hand: The Rotterdam study	Hoeven T.A.; Kavousi M.; Clockaerts S.; Kerkhof H.J.; Van,Meurs J.; Franco O.H.; Hofman A.; Bindels P.; Witteman J.C.; Bierma-Zeinstra S.M.	Osteoarthritis and Cartilage	2012	Inappropriate population
Association of atherosclerosis with presence and progression of osteoarthritis: the Rotterdam Study.	Hoeven TA.; Kavousi M.; Clockaerts S.; Kerkhof HJ.; van Meurs JB.; Franco O.; Hofman A.; Bindels P.; Witteman J.; Bierma-Zeinstra S.	Annals of the rheumatic diseases	2013	Inappropriate population
Associations among low back pain, income, and body mass index in Taiwan.	Hu HY.; Chen L.; Wu CY.; Chou YJ.; Chen RC.; Huang N.	The spine journal : official journal of the North American Spine Society	2013	Inappropriate population
Back pain and obesity in the 1958 British birth cohort. cause or effect?	Lake, J. K.; Power, C.; Cole, T. J.	Journal of Clinical Epidemiology	2000	Inappropriate population
C-reactive protein, metabolic syndrome and incidence of severe hip and knee osteoarthritis. A population-based cohort study	EngstrÃ¶m G.; Gerhardsson de Verdier M.; Rollof J.; Nilsson P.M.; Lohmander L.S.	Osteoarthritis and Cartilage	2009	Inappropriate population
Cancer risk is not increased after conventional hip arthroplasty	Visuri, T.; Pulkkinen, P.; Paavolainen, P.; Pukkala, E.	Acta Orthopaedica	2010	Inappropriate population
Causes of death after hip arthroplasty in primary arthrosis	Visuri, T.; Pulkkinen, P.; Paavolainen, P.; Koskenvuo, M.; Turula, K. B.	Journal of Arthroplasty	1997	Inappropriate population
Clinically important improvement in function is common in people with or at high risk of knee OA: The MOST study	White, Daniel K.; Keysor, Julie J.; LaValley, Michael P.; Lewis, Cora E.; Torner, James C.; Nevitt, Michael C.; Felson, David T.	Journal of Rheumatology	2010	Inappropriate population
Correlation of magnetic resonance imaging-based knee cartilage T2 measurements and focal knee lesions with body mass index: thirty-six-month followup data from a longitudinal, observational multicenter study	Baum, T.; Joseph, G. B.; Nardo, L.; Virayavanich, W.; Arulanandan, A.; Alizai, H.; Carballido-Gamio, J.; Nevitt, M. C.; Lynch, J.; McCulloch, C. E.; Link, T. M.	Arthritis Care Res (Hoboken)	2013	Inappropriate population
Diabetes is an independent predictor for severe osteoarthritis: results from a longitudinal cohort study	Schett, G.; Kleyer, A.; Perricone, C.; Sahinbegovic, E.; Iagnocco, A.; Zwerina, J.; Lorenzini, R.; Aschenbrenner, F.; Berenbaum, F.; D'Agostino, M. A.; Willeit, J.; Kiechl, S.	Diabetes Care	2013	Inappropriate population
Does Obesity Modify the Relationship between Exposure to Occupational Factors and Musculoskeletal Pain in Men? Results from the GAZEL Cohort Study	Evanoff, A.; Sabbath, E. L.; Carton, M.; Czernichow, S.; Zins, M.; Leclerc, A.; Descatha, A.	PLoS One	2014	Inappropriate population
The effect of noninsulin dependent diabetes mellitus on the prevalence of clinical osteoarthritis. A population based study	Frey, M. I.; Barrett-Connor, E.; Sledge, P. A.; Schneider, D. L.; Weisman, M. H.	Journal of Rheumatology	1996	Inappropriate population
Factors affecting the prevalence of osteoarthritis in healthy middle-aged women: Data from the longitudinal Melbourne Women's Midlife Health Project	Szoeke, C. E. I.; Cicuttini, F. M.; Guthrie, J. R.; Clark, M. S.; Dennerstein, L.	Bone	2006	Inappropriate population
Incidence and risk factors for radiographic knee osteoarthritis in middle-aged women: the Chingford Study.	Hart DJ.; Doyle DV.; Spector TD.	Arthritis and rheumatism	1999	Inappropriate population
The influence of socioeconomic status on the reporting of regional and widespread musculoskeletal pain: results from the 1958 British Birth Cohort Study.	Macfarlane,G. J.; Norrie,G.; Atherton,K.; Power,C.; Jones,G. T.	Annals of the Rheumatic Diseases	2009	Inappropriate population
Life course body mass index and risk of knee osteoarthritis at the age of 53 years: evidence from the 1946 British birth cohort study	Wills, A. K.; Black, S.; Cooper, R.; Coppack, R. J.; Hardy, R.; Martin, K. R.; Cooper, C.; Kuh, D.	Ann Rheum Dis	2012	Inappropriate population
The longitudinal relationship between body composition and patella cartilage in healthy adults.	Teichtahl AJ.; Wang Y.; Wluka AE.; Szramka M.; English DR.; Giles GG.; O'Sullivan R.; Cicuttini FM.	Obesity (Silver Spring, Md.)	2008	Inappropriate population
Markers of atherosclerosis in relation to presence and progression of knee osteoarthritis: A population-based cohort study	Hoeven, T. A.; Kavousi, M.; Ikram, M. A.; van Meurs, J. B.; Bindels, P. J.; Hofman, A.; Franco, O. H.; Bierma-Zeinstra, S. M.	Rheumatology (United Kingdom)	2015	Inappropriate population
Markers of atherosclerosis in relation to presence and progression of knee osteoarthritis: The rotterdam study	Hoeven T.A.; Kavousi M.; Ikram M.A.; Van,Meurs J.; Bindels P.J.; Hofman A.; Franco O.H.; Bierma-Zeinstra S.M.	Osteoarthritis and Cartilage	2014	Inappropriate population
NO PROSPECTIVE ASSOCIATION FOUND BETWEEN OBESITY AND CHRONIC, WIDESPREAD MUSCULOSKELETAL PAIN IN A POPULATION BASED 20-YEAR PROSPECTIVE FOLLOW-UP STUDY	Magnusson, K.; Osteras, N.; Mowinckel, P.; Bard, N.; Hagen, K. B.	Annals of the Rheumatic Diseases	2012	Inappropriate population
Obesity, physically demanding work and traumatic knee injury are major risk factors for knee osteoarthritis-a population-based study with a follow-up of 22 years	Toivanen, A. T.; Heliovaara, M.; Impivaara, O.; Arokoski, J. P. A.; Knekt, P.; Lauren, H.; Kroger, H.	Rheumatology	2010	Inappropriate population
Oral contraception and other factors in relation to back disorders in women: findings in a large cohort study	Vessey, M.; Painter, R.; Mant, J.	Contraception	1999	Inappropriate population
[Orthopedic findings from the longitudinal study]	Jahn, K.	Zeitschrift fur Alternsforschung	1978	Inappropriate population
Overweight and chronic illness - A retrospective cohort study, with a follow-up of 6-17 years, in men and women of initially 20-50 years of age	Seidell J.C.; Bakx K.C.; Deurenberg P.	Journal of Chronic Diseases	1986	Inappropriate population
Overweight, gender and knee osteoarthritis	Manninen, P.; Riihimaki, H.; Heliovaara, M.; Makela, P.	International Journal of Obesity & Related Metabolic Disorders: Journal of the International Association for the Study of Obesity	1996	Inappropriate population
Physical Activity and Incident Clinical Knee Osteoarthritis in Older Adults	Verweij,Lisanne M.; van Schoor,Natasja M.; Deeg,Dorly J. H.; Dekker,Joost; Visser,Marjolein	Arthritis & Rheumatism-Arthritis Care & Research	2009	Inappropriate population
Physical characteristics of the back are not predictive of low back pain in healthy workers: a prospective study	Van Nieuwenhuyse, A.; Crombez, G.; Burdorf, A.; Verbeke, G.; Masschelein, R.; Moens, G.; Mairiaux, P.	BMC Musculoskelet Disord	2009	Inappropriate population
Physical workload, leisure-time physical activity, obesity and smoking as predictors of multisite musculoskeletal pain. A 2-year prospective study of kitchen workers	Haukka, Eija; Ojajarvi, Anneli; Takala, Esa-Pekka; Viikari-Juntura, Eira; Leino-Arjas, Paivi	Occupational & Environmental Medicine	2012	Inappropriate population
Predictors of low back pain onset in a prospective British study.	Power C.; Frank J.; Hertzman C.; Schierhout G.; Li L.	American journal of public health	2001	Inappropriate population
[Prevalence of chronic diseases in the elderly; the ERGO study (Erasmus Rotterdam Health and the Elderly)]	Hofman, A.; Boerlage, P. A.; Bots, M. L.; den Breeijen, J. H.; de Bruijn, A. M.; Grobbee, D. E.; Hoes, A. W.; de Jong, P. T.; Koenders, M. J.; Odding, E.; et al.,	Nederlands Tijdschrift voor Geneeskunde	1995	Inappropriate population
Prevalence, incidence and progression of lumbar spondylosis by gender and age strata	Muraki, S.; Yoshimura, N.; Akune, T.; Tanaka, S.; Takahashi, I.; Fujiwara, S.	Modern Rheumatology	2014	Inappropriate population
Prevalence of inflammation-related multimorbidity among medicaid beneficiaries with chronic obstructive pulmonary disease	Ajmera, M. R.; Rust, G.; Sambamoorthi, U.	Value in Health	2014	Inappropriate population
Prognostic factors of prolonged disability in patients with chronic low back pain and lumbar degeneration in primary care: A cohort study	Wilkens, P.; Scheel, I. B.; Grundnes, O.; Hellum, C.; Storheim, K.	Spine	2013	Inappropriate population
Psychosocial and lifestyle correlates of musculoskeletal pain patterns in adolescence: A 2-year follow-up study	Jussila, L.; Paananen, M.; NÃ¤yhÃ¤, S.; Taimela, S.; Tammelin, T.; Auvinen, J.; Karppinen, J.	European Journal of Pain (United Kingdom)	2014	Inappropriate population
Risk factors for incident neck and shoulder pain in hospital nurses	Smedley, J.; Inskip, H.; Trevelyan, F.; Buckle, P.; Cooper, C.; Coggon, D.	Occup Environ Med	2003	Inappropriate population
Risk factors for knee replacement due to primary osteoarthritis, a population based, prospective cohort study of 315,495 individuals	Apold, H.; Meyer, H. E.; Nordsletten, L.; Furnes, O.; Baste, V.; Flugsrud, G. B.	BMC Musculoskelet Disord	2014	Inappropriate population
Risk factors for persistence of multiple musculoskeletal pains in adolescence: a 2-year follow-up study.	Paananen MV.; Taimela SP.; Auvinen JP.; Tammelin TH.; Kantomaa MT.; Ebeling HE.; Taanila AM.; Zitting PJ.; Karppinen JI.	European journal of pain (London, England)	2010	Inappropriate population
Risk factors for total hip replacement due to primary osteoarthritis: a cohort study in 50,034 persons	Flugsrud, G. B.; Nordsletten, L.; Espehaug, B.; Havelin, L. I.; Meyer, H. E.	Arthritis & Rheumatism	2002	Inappropriate population
Risk factors predicting hip pain in a 5-year prospective cohort study	TÃ¼chsen F.; Hannerz H.; Burr H.; Lund T.; Krause N.	Scandinavian Journal of Work, Environment and Health	2003	Inappropriate population
Severity of osteoarthritis symptoms and disability predicts risk for serious cardiovascular events.	Hawker,G. A.; Croxford,R.; Bierman,A.; Harvey,P.; Lipscombe,L.	Osteoarthritis and Cartilage	2012	Inappropriate population
Should risk of bone fragility restrict weight control for other health reasons in postmenopausal women? - A ten year prospective study	Sirola, J.; Rikkonen, T.; Tuppurainen, M.; Honkanen, R.; Kroger, H.	Maturitas	2012	Inappropriate population
Smoking, body weight, physical exercise, and risk of lower limb total joint replacement in a population-based cohort of men.	Mnatzaganian G.; Ryan P.; Norman PE.; Davidson DC.; Hiller JE.	Arthritis and rheumatism	2011	Inappropriate population
Weight gain and the risk of knee replacement due to primary osteoarthritis: a population based, prospective cohort study of 225,908 individuals.	Apold H.; Meyer HE.; Nordsletten L.; Furnes O.; Baste V.; Flugsrud GB.	Osteoarthritis and cartilage / OARS, Osteoarthritis Research Society	2014	Inappropriate population
Weight gain and the risk of total hip replacement a population-based prospective cohort study of 265,725 individuals	Apold H.; Meyer H.E.; Espehaug B.; Nordsletten L.; Havelin L.I.; Flugsrud G.B.	Osteoarthritis and Cartilage	2011	Inappropriate population
What Risk Factors Are Associated With Musculoskeletal Injury in US Army Rangers? A Prospective Prognostic Study.	Teyhen DS.; Shaffer SW.; Butler RJ.; Goffar SL.; Kiesel KB.; Rhon DI.; Williamson JN.; Plisky PJ.	Clinical orthopaedics and related research	2015	Inappropriate population
Diabetes mellitus as an independent predictor for severe osteoarthritis	Schett, G.; Kleyer, A.; D'Agostino, M. A.; Perricone, C.; Iagnocco, A.; Sahinbegovic, E.; Berenbaum, F.; Zwerina, J.; Willeit, J.; Kiechl, S.	Annals of the Rheumatic Disease	2013	Inappropriate population
A PROSPECTIVE-STUDY OF THE ROLE OF CARDIOVASCULAR RISK-FACTORS AND FITNESS IN INDUSTRIAL BACK PAIN COMPLAINTS	Battie, M. C.; Bigos, S. J.; Fisher, L. D.; Hansson, T. H.; Nachemson, A. L.; Spengler, D. M.; Wortley, M. D.; Zeh, J.	Spine	1989	Inappropriate population
Risk factors for more severe regional musculoskeletal symptoms: A two-year prospective study of a general working population	Andersen, J. H.; Haahr, J. P.; Frost, P.	Arthritis Rheum	2007	Inappropriate population
Abdominal Circumference Is Superior to Body Mass Index in Estimating Musculoskeletal Injury Risk	Nye, Nathaniel S.; Carnahan, David H.; Jackson, Jonathan C.; Covey, Carlton J.; Zarzabal, Lee A.; Chao, Susan Y.; Bockhorst, Archie D.; Crawford, Paul F.	Medicine & Science in Sports & Exercise	2014	Inappropriate population
Lifestyle factors and hip arthrosis. A case referent study of body mass index, smoking and hormone therapy in 503 Swedish women	Vingard, E.; Alfredsson, L.; Malchau, H.	Acta Orthop Scand	1997	Inappropriate population
Reduced quadriceps strength relative to body weight: a risk factor for knee osteoarthritis in women?	Slemenda C.; Heilman DK.; Brandt KD.; Katz BP.; Mazzuca SA.; Braunstein EM.; Byrd D.	Arthritis and rheumatism	1998	Inappropriate population
Increased cancer risks among arthroplasty patients: 30 year follow-up of the Swedish Knee Arthroplasty Register.	Wagner, Philippe; Olsson, Hakan; Lidgren, Lars; Robertsson, Otto; Ranstam, Jonas	European journal of cancer (Oxford, England : 1990)	2011	Inappropriate population
Musculoskeletal pain in Japan: prospective health diary study.	Tokuda Y; Ohde S; Takahashi O; Shakudo M; Yanai H; Shimbo T; Fukuhara S; Hinohara S; Fukui T	Rheumatology international	2007	Inappropriate population
Lifestyle-Factors in Adolescence as Predictors of Number of Musculoskeletal Pain Sites in Adulthood: A 17-Year Follow-Up Study of a Birth Cohort	Puroila, A.; Paananen, M.; Taimela, S.; Jarvelin, M. R.; Karppinen, J.	Pain Medicine (United States)	2015	Inappropriate population
Cardiovascular disease is increased prior to onset of rheumatoid arthritis but not osteoarthritis: the population-based Nord-Trondelag health study (HUNT).	Pahau H; Brown MA; Paul S; Thomas R; Videm V	Arthritis Research & Therapy	2014	Inappropriate population
Does hypertension protect against chronic musculoskeletal complaints? The Nord-Trondelag Health Study	Hagen, K.; Zwart, J. A.; Holmen, J.; Svebak, S.; Bovim, G.; Stovner, L. J.; Nord-Trondelag Health, Study	Archives of Internal Medicine	2005	Inappropriate population
The Effects of Shift Work and Interaction Between Shift Work and Overweight/Obesity on Low Back Pain in Nurses Results From a Longitudinal Study	Zhao, I.; Bogossian, F.; Turner, C.	Journal of Occupational and Environmental Medicine	2012	Inappropriate population
Lower limbs composition and radiographic knee osteoarthritis (RKOA) in Chingford sample--a longitudinal study	Blumenfeld, O.; Williams, F. M.; Hart, D. J.; Arden, N. K.; Spector, T. D.; Livshits, G.	Archives of Gerontology & Geriatrics	2013	Inappropriate population
The epidemiology of knee osteoarthritis: results from the Framingham Osteoarthritis Study	Felson, D. T.	Semin Arthritis Rheum	1990	Inappropriate population
Age, bodyweight, smoking habits and the risk of severe osteoarthritis in the hip and knee in men.	Jarvholm B; Lewold S; Malchau H; Vingard E	European journal of epidemiology	2005	Inappropriate population
Mortality rate and causes of death in women with self-reported musculoskeletal pain: Results from a 17-year follow-up study.	Nitter,A. K.; Forseth,K. T.	Scandinavian Journal of Pain	2013	Inappropriate population
Coexisting chronic conditions associated with mortality and morbidity in adult patients with asthma.	Sumino K.; O'Brian K.; Bartle B.; Au DH.; Castro M.; Lee TA.	The Journal of asthma : official journal of the Association for the Care of Asthma	2014	Inappropriate population
Mortality rate in veterans with multiple chronic conditions	T.A., Lee; A.E., Shields; C., Vogeli; T.B., Gibson; M., Woong-Sohn; W.D., Marder; D., Blumenthal; K.B., Weiss; Lee, Todd A; Shields, Alexandra E; Vogeli, Christine; Gibson, Teresa B; Woong-Sohn, Min; Marder, William D; Blumenthal, David; Weiss, Kevin B	Journal of General Internal Medicine	2007	Inappropriate population
Body mass index and alignment and their interaction as risk factors for progression of knees with radiographic signs of osteoarthritis.	Yusuf E.; Bijsterbosch J.; Slagboom PE.; Rosendaal FR.; Huizinga TW.; Kloppenburg M.	Osteoarthritis and cartilage / OARS, Osteoarthritis Research Society	2011	Inappropriate population
Childhood and family influences on depression, chronic physical conditions, and their comorbidity: findings from the Ontario Child Health Study.	Gonzalez A.; Boyle MH.; Kyu HH.; Georgiades K.; Duncan L.; MacMillan HL.	Journal of psychiatric research	2012	Inappropriate population
No strong temporal relationship between obesity and multisite pain--results from a population-based 20-year follow-up study	Magnusson, K.; Osteras, N.; Mowinckel, P.; Natvig, B.; Hagen, K. B.	European Journal of Pain	2014	Inappropriate population
No prospective association found between obesity and chronic, widespread musculoskeletal pain in a population based 20-year prospective follow-up study.	Magnusson,K.; Osteras,N.; Mowinckel,P.; Bard,N.; Hagen,K. B.	Annals of the Rheumatic Disease	2013	Inappropriate population
Is excess weight related to chronic spinal pain?	Baker, Pg; Giles, Lg	Chiropractic Journal of Australia	1999	Inappropriate population
Chronic musculoskeletal complaints as a predictor of mortality—The HUNT study	Asberga, AN.; Stovnera, LJ.; Zwartc, J.; Winsvoldc, BS.; Heuchc, I.; Hagen, K.;	Pain	2016	Inappropriate population
Work, diabetes and obesity: A seven year follow-up study among Danish health care workers	Poulsen, K.; Cleal, B.; Clausen, T.; Andersen, LL.;	PLOS one	2014	Inappropriate population
Osteoarthritis-related difficulty walking and risk for diabetes complications	Hawker, GA.; Croxford, R.; Bierman, AS.; Harvey, P.; Ravi, B.; Kendzerska, T.; Stanaitis, I.; King, LK.; Lipscombe, L.;	Osteoarthritis and Cartilage	2017	Inappropriate population
The longitudinal relationship between hand, hip and knee osteoarthritis and cardiovascular events: a population-based cohort study	Kendzerska, T.; Juni, P.; King, LK.; Croxford, R.; Stanaitis, I.; Hawker, GA.;	Osteoarthritis and Cartilage	2017	Inappropriate population
Accumulation of metabolic risk factors such as overweight, hypertension, dyslipidaemia, and impaired glucose tolerance raises the risk of occurrence and progression of knee osteoarthritis: a 3-year follow-up of the ROAD study.	Yoshimura N.; Muraki S.; Oka H.; Tanaka S.; Kawaguchi H.; Nakamura K.; Akune T.	Osteoarthritis and cartilage / OARS, Osteoarthritis Research Society	2012	Inappropriate outcomes
Accumulation of metabolic risk factors such as overweight, hypertension, dyslipidemia, and impaired glucose tolerance raises the risk of occurrence and progression of knee osteoarthritis: A 3-year follow-up of the road study	Yoshimura N.; Muraki S.; Oka H.; Kawaguchi H.; Nakamura K.; Akune T.	Osteoporosis International	2012	Inappropriate outcomes
Are risk factors for atherothrombotic disease associated with back pain sickness absence? The Whitehall II study	Hemingway, H.; Shipley, M.; Stansfeld, S.; Shannon, H.; Frank, J.; Brunner, E.; Marmot, M.	Journal of Epidemiology and Community Health	1999	Inappropriate outcomes
Association between overweight and low back pain: a population-based prospective cohort study of adolescents	Mikkonen, P. H.; Laitinen, J.; Remes, J.; Tammelin, T.; Taimela, S.; Kaikkonen, K.; Zitting, P.; Korpelainen, R.; Karppinen, J.	Spine	2013	Inappropriate outcomes
The association between self-reported cardiovascular disorders and troublesome neck pain: a population-based cohort study	Nolet, P. S.; Cote, P.; Cassidy, J. D.; Carroll, L. J.	Journal of Manipulative & Physiological Therapeutics	2012	Inappropriate outcomes
Association of baseline knee bone size, cartilage volume, and body mass index with knee cartilage loss over time: a longitudinal study in younger or middle-aged adults	Antony, B.; Ding, C.; Stannus, O.; Cicuttini, F.; Jones, G.	Journal of Rheumatology	2011	Inappropriate outcomes
Association of knee osteoarthritis with onset and resolution of pain and physical functional disability: the ROAD study.	Muraki S.; Akune T.; Nagata K.; Ishimoto Y.; Yoshida M.; Tokimura F.; Tanaka S.; Oka H.; Kawaguchi H.; Nakamura K.; Yoshimura N.	Modern rheumatology / the Japan Rheumatism Association	2014	Inappropriate outcomes
Association of weight gain with incident knee pain, stiffness, and functional difficulties: A longitudinal study	Tanamas, S. K.; Wluka, A. E.; Davies-Tuck, M.; Wang, Y. Y.; Strauss, B. J.; Proietto, J.; Dixon, J. B.; Jones, G.; Forbes, A.; Cicuttini, F. M.	Arthritis Care & Research	2013	Inappropriate outcomes
Associations between cardiovascular disease severity, osteoarthritis co-morbidity and physical health: a population-based study.	Prior JA.; Jordan KP.; Kadam UT.	Rheumatology (Oxford, England)	2014	Inappropriate outcomes
Back problems and atherosclerosis: The study of osteoporotic fractures	Vogt, M. T.; Nevitt, M. C.; Cauley, J. A.	Spine (Phila Pa 1976)	1997	Inappropriate outcomes
BMI vs. body composition and radiographically defined osteoarthritis of the knee in women: a 4-year follow-up study.	Sowers MF.; Yosef M.; Jamadar D.; Jacobson J.; Karvonen-Gutierrez C.; Jaffe M.	Osteoarthritis and cartilage / OARS, Osteoarthritis Research Society	2008	Inappropriate outcomes
Body mass index associated with onset and progression of osteoarthritis of the knee but not of the hip: the Rotterdam Study.	Reijman M.; Pols HA.; Bergink AP.; Hazes JM.; Belo JN.; Lievense AM.; Bierma-Zeinstra SM.	Annals of the rheumatic diseases	2007	Inappropriate outcomes
Body mass index in young men and the risk of subsequent knee and hip osteoarthritis	Gelber A.C.; Hochberg M.C.; Mead L.A.; Wang N.-Y.; Wigley F.M.; Klag M.J.	American Journal of Medicine	1999	Inappropriate outcomes
Body mass index is associated with low back pain in childhood and adolescence: a birth cohort study with a 6-year follow-up in Niigata City, Japan.	Sano A.; Hirano T.; Watanabe K.; Endo N.; Ito T.; Tanabe N.	European spine journal : official publication of the European Spine Society, the European Spinal Deformity Society, and the European Section of the Cervical Spine Research Society	2015	Inappropriate outcomes
A comparison of lower extremity muscle strength, obesity, and depression scores in elderly subjects with knee pain with and without radiographic evidence of knee osteoarthritis.	Brandt KD.; Heilman DK.; Slemenda C.; Katz BP.; Mazzuca S.; Braunstein EM.; Byrd D.	The Journal of rheumatology	2000	Inappropriate outcomes
Disabling knee pain--another consequence of obesity: results from a prospective cohort study.	Jinks, Clare; Jordan, Kelvin; Croft, Peter	BMC public health	2006	Inappropriate outcomes
Disc degeneration of the lumbar spine in relation to overweight	Liuke, M.; Solovieva, S.; Lamminen, A.; Luoma, K.; Leino-Arjas, P.; Luukkonen, R.; Riihimaki, H.	International Journal of Obesity	2005	Inappropriate outcomes
Do abnormal serum lipid levels increase the risk of chronic low back pain? the nord-trondelag health study	Heuch, I.; Hagen, K.; Zwart, J. A.	PLoS ONE [Electronic Resource]	2014	Inappropriate outcomes
Does leisure time physical activity prevent low back disorders? A prospective study of metal industry employees	Leino, P. I.	Spine	1993	Inappropriate outcomes
Does high blood pressure reduce the risk of chronic low back pain? the Nord-Trondelag Health Study	Heuch, I.; Hagen, K.; Zwart, J. A.	European Journal of Pain (United Kingdom)	2014	Inappropriate outcomes
Factors predicting health-related quality of life in knee osteoarthritis among community-dwelling women in Japan: the Hizen-Oshima study	Norimatsu, T.; Osaki, M.; Tomita, M.; Ye, Z.; Abe, Y.; Honda, S.; Kanagae, M.; Mizukami, S.; Takamura, N.; Kusano, Y.; Shindo, H.; Aoyagi, K.	Orthopedics	2011	Inappropriate outcomes
Factors associated with radiographic osteoarthritis: results from the population study 70-year-old people in Goteborg	Bagge, E.; Bjelle, A.; Eden, S.; Svanborg, A.	Journal of Rheumatology	1991	Inappropriate outcomes
Hip Osteoarthritis and the Risk of All-Cause and Disease-Specific Mortality in Older Women: A Population-Based Cohort Study.	Barbour KE.; Lui LY.; Nevitt MC.; Murphy LB.; Helmick CG.; Theis KA.; Hochberg MC.; Lane NE.; Hootman JM.; Cauley JA.; .	Arthritis & rheumatology (Hoboken, N.J.)	2015	Inappropriate outcomes
The impact of waist circumference on function and physical activity in older adults: longitudinal observational data from the osteoarthritis initiative	Batsis,J. A.; Zbehlik,A. J.; Barre,L. K.; Mackenzie,T. A.; Bartels,S. J.	Nutrition journal	2014	Inappropriate outcomes
Incidence and risk factors for radiographic knee osteoarthritis and knee pain in Japanese men and women: a longitudinal population-based cohort study.	Muraki S.; Akune T.; Oka H.; Ishimoto Y.; Nagata K.; Yoshida M.; Tokimura F.; Nakamura K.; Kawaguchi H.; Yoshimura N.	Arthritis and rheumatism	2012	Inappropriate outcomes
Incidence and risk factors for radiographic lumbar spondylosis: The road study	Muraki, S.; Akune, T.; Oka, H.; Nakamura, K.; Kawaguchi, H.; Yoshimura, N.	Osteoarthritis and Cartilage	2011	Inappropriate outcomes
Incidence of severe knee and hip osteoarthritis in relation to the metabolic syndrome and its components: A prospective cohort study	Hussain S.M.; Wang Y.; Cicuttini F.; Simpson J.A.; Giles G.; Graves S.; Wluka A.	Annals of the Rheumatic Diseases	2013	Inappropriate outcomes
Incidence of severe knee and hip osteoarthritis in relation to the metabolic syndrome and its components: A prospective cohort study	Wang Y.; Hussain S.; Cicuttini F.M.; Simpson J.A.; Giles G.G.; Graves S.E.; Wluka A.E.	Osteoarthritis and Cartilage	2013	Inappropriate outcomes
Influence of chronic diseases on long-term change in physical health: a consultation-survey linkage cohort study in general practice	Prior, J. A.; Jordan, K. P.; Kadam, U. T.	Quality Of Life Research: An International Journal Of Quality Of Life Aspects Of Treatment, Care And Rehabilitation	2012	Inappropriate outcomes
Interleukin-6 is a significant predictor of radiographic knee osteoarthritis: The Chingford Study.	Livshits G.; Zhai G.; Hart DJ.; Kato BS.; Wang H.; Williams FM.; Spector TD.	Arthritis and rheumatism	2009	Inappropriate outcomes
Is comorbidity in adolescence a predictor for adult low back pain? A prospective study of a young population	Hestbaek, L.; Leboeuf-Yde, C.; Kyvik, K. O.	BMC Musculoskeletal Disorders	2006	Inappropriate outcomes
Is obesity a risk factor for progressive radiographic knee osteoarthritis?	Niu J.; Zhang YQ.; Torner J.; Nevitt M.; Lewis CE.; Aliabadi P.; Sack B.; Clancy M.; Sharma L.; Felson DT.	Arthritis and rheumatism	2009	Inappropriate outcomes
Lifetime risk of symptomatic knee osteoarthritis.	Murphy L; Schwartz TA; Helmick CG; Renner JB; Tudor G; Koch G; Dragomir A; Kalsbeek WD; Luta G; Jordan JM	Arthritis & Rheumatism	2008	Inappropriate outcomes
A longitudinal study of back pain and radiological changes in the lumbar spines of middle aged women. I. Clinical findings	Symmons, D. P.; van Hemert, A. M.; Vandenbroucke, J. P.; Valkenburg, H. A.	Annals of the Rheumatic Diseases	1991	Inappropriate outcomes
A longitudinal study of back pain and radiological changes in the lumbar spines of middle aged women. II. Radiographic findings	Symmons, D. P.; van Hemert, A. M.; Vandenbroucke, J. P.; Valkenburg, H. A.	Annals of the Rheumatic Diseases	1991	Inappropriate outcomes
Longitudinal study on work related and individual risk factors affecting radiating neck pain	Viikari-Juntura, E.; Martikainen, R.; Luukkonen, R.; Mutanen, P.; Takala, E.; RiihimÃ¤ki, H.	Occupational & Environmental Medicine	2001	Inappropriate outcomes
Low back pain among nurses: a follow-up beginning at entry to the nursing school	Videman, T.; OjajÃ¤rvi, A.; RiihimÃ¤ki, H.; Troup, J. D. G.	Spine	2005	Inappropriate outcomes
Low back pain and subsequent cardiovascular mortality	Heliovaara, M.; Makela, M.; Aromaa, A.; Impivaara, O.; Knekt, P.; Reunanen, A.	Spine	1995	Inappropriate outcomes
Low back pain, work absenteeism, chronic back disorders, and clinical findings in the low back as predictors of hospitalization due to low back disorders: a 28-year follow-up of industrial employees	KÃ¤Ã¤riÃ¤, S.; Kaila-Kangas, L.; Kirjonen, J.; RiihimÃ¤ki, H.; Luukkonen, R.; Leino-Arjas, P.	Spine	2005	Inappropriate outcomes
Natural history and risk factors of radiographic knee osteoarthritis: Wuchuan osteoarthritis study.	Liu,Q.; Niu,J.; Ke,Y.; Huang,J.; Jin,Q.; Wu,X.; Tang,X.; Cao,Z.; Zhang,Y.; Lin,J.	Osteoarthritis and Cartilage	2015	Inappropriate outcomes
Natural history of knee cartilage defects and factors affecting change	Ding, C.; Cicuttini, F.; Scott, F.; Cooley, H.; Boon, C.; Jones, G.	Archives of Internal Medicine	2006	Inappropriate outcomes
Neck/shoulder and back pain in new graduate nurses: A growth mixture modeling analysis	Lovgren, Malin; Gustavsson, Petter; Melin, Bo; Rudman, Ann	International Journal of Nursing Studies	2014	Inappropriate outcomes
Nottingham knee osteoarthritis risk prediction models.	Zhang W.; McWilliams DF.; Ingham SL.; Doherty SA.; Muthuri S.; Muir KR.; Doherty M.	Annals of the rheumatic diseases	2011	Inappropriate outcomes
Normal Weight with Central Obesity, Physical Activity, and Functional Decline: Data from the Osteoarthritis Initiative	Batsis, John A.; Zbehlik, Alicia J.; Scherer, Emily A.; Barre, Laura K.; Bartels, Stephen J.	Journal of the American Geriatrics Society	2015	Inappropriate outcomes
Obesity, vitamin D status, and osteoarthritis	Ding, C.	Clinical and Experimental Pharmacology and Physiology	2013	Inappropriate outcomes
One in four people may develop symptomatic hip osteoarthritis in his or her lifetime.	Murphy LB.; Helmick CG.; Schwartz TA.; Renner JB.; Tudor G.; Koch GG.; Dragomir AD.; Kalsbeek WD.; Luta G.; Jordan JM.	Osteoarthritis and cartilage / OARS, Osteoarthritis Research Society	2010	Inappropriate outcomes
Osteoarthritis: a comorbid marker for longer life?	Lee, Todd A; Pickard, A Simon; Bartle, Brian; Weiss, Kevin B	Annals of epidemiology	2007	Inappropriate outcomes
Persistence and Remission of Musculoskeletal Pain in Community-Dwelling Older Adults: Results from the Cardiovascular Health Study	Thielke, Stephen M.1,2; Whitson, Heather3,4; Diehr, Paula5,6; O'Hare, Ann7,8; Kearney, Patricia M.9; Chaudhry, Sarwat I.10; Zakai, Neil A.11,12; Kim, Dae13; Sekaran, Nishant14; Sale, Joanna E. M.15; Arnold, Alice M.5; Chaves, Paulo15; Newman, Anne16	Journal of the American Geriatrics Society	2012	Inappropriate outcomes
Predictors of musculoskeletal pain in men: a twenty-year follow-up from examination at enlistment	Hellsing, A.; Bryngelsson, I.	Spine (Phila Pa 1976)	2000	Inappropriate outcomes
Predictors of onset and progression of knee pain in adults living in the community. A prospective study.	Jinks C; Jordan KP; Blagojevic M; Croft P	Rheumatology	2008	Inappropriate outcomes
Predictors of sickness absence related to musculoskeletal pain: a two-year follow-up study of workers in municipal kitchens	Haukka, E.; Kaila-Kangas, L.; Luukkonen, R.; Takala, E. P.; Viikari-Juntura, E.; Leino-Arjas, P.	Scandinavian Journal of Work Environment & Health	2014	Inappropriate outcomes
Prevalence of pain with advancing age brief report.	Rottenberg Y.; Jacobs JM.; Stessman J.	Journal of the American Medical Directors Association	2015	Inappropriate outcomes
Prevalence, incidence, and recurrence of low back pain in scaffolders during a 3-year follow-up study	Elders, L. A. M.; Burdorf, A.	Spine (03622436)	2004	Inappropriate outcomes
Progressive increase in body mass index is not associated with a progressive increase in joint space narrowing in obese women with osteoarthritis of the knee.	Le Graverand MP.; Brandt K.; Mazzuca SA.; Raunig D.; Vignon E.	Annals of the rheumatic diseases	2009	Inappropriate outcomes
A prospective study of the role of cardiovascular risk factors and fitness in industrial back pain complaints	Battie, M. C.; Bigos, S. J.; Fisher, L. D.; Hansson, T. H.; Nachemson, A. L.; Spengler, D. M.; Wortley, M. D.; Zeh, J.	Spine	1989	Inappropriate outcomes
A prospective study on knee pain and its risk factors	Miranda, H.; Viikari-Juntura, E.; Martikainen, R.; Riihimaki, H.	Osteoarthritis and Cartilage	2002	Inappropriate outcomes
Rationale, design and methods for the 22 year follow-up of the Western Australian Pregnancy Cohort (Raine) Study.	Straker LM.; Hall GL.; Mountain J.; Howie EK.; White E.; McArdle N.; Eastwood PR.; .	BMC public health	2015	Inappropriate outcomes
Risk factors for illness absence due to musculoskeletal disorders in a 4-year prospective study of a petroleum-manufacturing population	Tsai, Shan P.; Bhojani, Faiyaz A.; Wendt, Judy K.	Journal of Occupational and Environmental Medicine	2011	Inappropriate outcomes
Relationship of height, weight and body mass index to the risk of hip and knee replacements in middle-aged women.	Liu B; Balkwill A; Banks E; Cooper C; Green J; Beral V	Rheumatology	2007	Inappropriate outcomes
Risk factors for restricting back pain in older persons.	Makris UE.; Fraenkel L.; Han L.; Leo-Summers L.; Gill TM.	Journal of the American Medical Directors Association	2014	Inappropriate outcomes
Risk factors for the incidence and progress rate of radiographic knee osteoarthritis in Japanese men and women: The road study	Muraki, S.; Akune, T.; Oka, H.; Kawaguchi, H.; Nakamura, K.; Yoshimura, N.	Osteoarthritis and Cartilage	2011	Inappropriate outcomes
Risk factors for the incidence and progression of radiographic knee osteoarthritis	Cooper,C.; Snow,S.; Mcalindon,T.E.; Kellingray,S.; Stuart,B.; Coggon,D.; Dieppe,P.A.	Arthritis and Rheumatism	2000	Inappropriate outcomes
Risk factors for the incidence and progression of radiographic osteoarthritis of the knee among Japanese.	Nishimura A.; Hasegawa M.; Kato K.; Yamada T.; Uchida A.; Sudo A.	International orthopaedics	2011	Inappropriate outcomes
Smoking and overweight as predictors of hospitalization for back disorders	Kaila-Kangas, Leena; Leino-Arjas, Paivi; Riihimaki, Hilkka; Luukkonen, Ritva; Kirjonen, Juhani	Spine	2003	Inappropriate outcomes
Ten year course of low back pain in an adult population-based cohort--the Doetinchem cohort study	van Oostrom, S. H.; Monique Verschuren, W. M.; de Vet, H. C.; Picavet, H. S.		2011	Inappropriate outcomes
Transitions to mobility difficulty associated with lower extremity osteoarthritis in high functioning older women: Longitudinal data from the Women's Health and Aging Study II	Ling,S. M.; Xue,Q. L.; Simonsick,E. M.; Tian,J.; Bandeen-Roche,K.; Fried,L. P.; Bathon,J. M.	Arthritis & Rheumatism-Arthritis Care & Research	2006	Inappropriate outcomes
Weight gain is associated with worse knee symptoms in community-based men and women: A longitudinal study	Tanamas, S. K.; Wluka, A. E.; Davies-Tuck, M.; Wang, Y.; Strauss, B. J.; Proietto, J.; Dixon, J. B.; Jones, G.; Cicuttini, F. M.		2011	Inappropriate outcomes
Persistence of noncancer-related musculoskeletal chronic pain among community-dwelling older people: A population-based longitudinal study in Finland	Karttunen,N. M.; Turunen,J. H. O.; Ahonen,R. S.; Hartikainen,S. A.	Clinical Journal of Pain	2014	Inappropriate outcomes
Back pain and risk of fatal ischaemic heart disease: 13 year follow up of Finnish farmers	Penttinen, J.	BMJ	1994	Inappropriate outcomes
HYPERMOBILITY IS A RISK FACTOR FOR MUSCULOSKELETAL PAIN IN ADOLESCENCE: FINDINGS FROM A PROSPECTIVE COHORT STUDY	Tobias, J.; Deere, K.; Palmer, S.; Clark, E.; Clinch, J.	Rheumatology	2013	Inappropriate outcomes
Overweight and musculoskeletal morbidity: a ten-year follow-up	Aro, S.; Leino, P.	Int J Obes	1985	Inappropriate outcomes
Adiposity and loss of lean mass are associated with increased knee pain in older adults	Jin X.; Ding C.; Wang X.; Antony B.E.; Laslett L.; Blizzard L.; Jones G.	Annals of the Rheumatic Diseases	2014	Inappropriate outcomes
Adiposity is more consistently associated with increased non-weight bearing than weight-bearing knee pain in older adults: A cohort study	Jin X.; Ding C.; Wang X.; Antony B.; Laslett L.; Blizzard L.; Jones G.	Osteoarthritis and Cartilage	2014	Inappropriate outcomes
Knee symptomatic osteoarthritis, walking disability and all-cause mortality in the population-based longitudinal Wuchuan osteoarthritis study	Liu, Q.; Niu, J.; Ke, Y.; Huang, J.; Li, H.; Wu, X.; Tang, X.; Li, R.; Zhang, Y.; Lin, J.	Osteoarthritis and Cartilage	2015	Inappropriate outcomes
The natural history of knee pain in a prospective longitudinal population-based cohort: Identifying important patient phenotypes	Soni, A.; White, K.; Kiran, A.; Goulston, L.; Hart, D.; Spector, T.; Javaid, M. K.; Arden, N. K.	Rheumatology	2010	Inappropriate outcomes
Body fat and lean mass have opposite effects on loss of knee cartilage and increase in knee pain in older adults: A prospective cohort study	Ding, C.; Stannus, O.; Antony, B.; Cicuttini, F.; Jones, G.	Osteoarthritis and Cartilage	2012	Inappropriate outcomes
Hip osteoarthritis and risk of all cause and disease-specific mortality among older women: A population-based cohort study	Barbour, K. E.; Lui, L. Y.; Helmick, C. G.; Theis, K. A.; Nevitt, M. C.; Lane, N. E.; Murphy, L.; Hootman, J. M.; Hochberg, M. C.; Cauley, J. A.	Arthritis and Rheumatism	2013	Inappropriate outcomes
Normal weight central obesity and functional decline: The osteoarthritis initiative	Batsis, J. A.; Zbehlik, A.; Barre, L. K.; Lopez-Jimenez, F.; Bartels, S. J.	Journal of the American Geriatrics Society	2014	Inappropriate outcomes
Increasing body mass index z-score is continuously associated with complications of overweight in children, even in the healthy weight range	Bell, L. M.; Byrne, S.; Thompson, A.; Ratnam, N.; Blair, E.; Bulsara, M.; Jones, T. W.; Davis, E. A.	Journal of Clinical Endocrinology & Metabolism	2007	Inappropriate outcomes
Prognostic factors for musculoskeletal sickness absence and return to work among welders and metal workers	Burdorf, A.; Naaktgeboren, B.; Post, W.	Occup Environ Med	1998	Inappropriate outcomes
Knee cartilage defects in a sample of older adults: natural history, clinical significance and factors influencing change over 2.9 years.	Carnes J.; Stannus O.; Cicuttini F.; Ding C.; Jones G.	Osteoarthritis and cartilage / OARS, Osteoarthritis Research Society	2012	Inappropriate outcomes
Overweight, obesity and risk of work disability: a cohort study of construction workers in Germany	Claessen, H.; Arndt, V.; Drath, C.; Brenner, H.	Occupational & Environmental Medicine	2009	Inappropriate outcomes
Body fat is associated with increased and lean mass with decreased knee cartilage loss in older adults: a prospective cohort study.	Ding C.; Stannus O.; Cicuttini F.; Antony B.; Jones G.	International journal of obesity (2005)	2013	Inappropriate outcomes
Long-term physical functioning in persons with knee osteoarthritis from NHANES. I: Effects of comorbid medical conditions.	Ettinger WH.; Davis MA.; Neuhaus JM.; Mallon KP.	Journal of clinical epidemiology	1994	Inappropriate outcomes
Risk factors for incident radiographic knee osteoarthritis in the elderly: the Framingham Study	Felson, D. T.; Zhang, Y.; Hannan, M. T.; Naimark, A.; Weissman, B.; Aliabadi, P.; Levy, D.	Arthritis & Rheumatism	1997	Inappropriate outcomes
Role of overweight and obesity in low back disorders among men: A longitudinal study with a life course approach	Frilander, H.; Solovieva, S.; Mutanen, P.; Pihlajamaki, H.; Heliovaara, M.; Viikari-Juntura, E.	BMJ Open	2015	Inappropriate outcomes
Body weight is a stronger predictor of knee pain than body composition	Goulston, L.; Culliford, D.; Coakley, P.; Taylor, P.; Hart, D.; Spector, T.; Hakim, A.; Arden, N.	Rheumatology (United Kingdom)	2013	Inappropriate outcomes
Cardiovascular risk factors and low-back pain in a long-term follow-up of industrial employees	Leino-Arjas, P.; Solovieva, S.; Kirjonen, J.; Reunanen, A.; Riihimaki, H.	Scandinavian Journal of Work Environment & Health	2006	Inappropriate outcomes
European project on osteoarthritis: Design of a six-cohort study on the personal and societal burden of osteoarthritis in an older European population	Van Der Pas, S.; Castell, M. V.; Cooper, C.; Denkinger, M.; Dennison, E. M.; Edwards, M. H.; Herbolsheimer, F.; Limongi, F.; Lips, P.; Maggi, S.; Nasell, H.; Nikolaus, T.; Otero, A.; Pedersen, N. L.; Peter, R.; Sanchez-Martinez, M.; Schaap, L. A.; Zambon, S.; Van Schoor, N. M.; Deeg, D. J. H.	BMC Musculoskeletal Disorders	2013	Inappropriate outcomes
Incidence and risk factors of disability in the elderly: The Rotterdam Study.	Tas,U.; Verhagen,A. P.; Bierma-Zeinstra,S. M. A.; Hofman,A.; Odding,E.; Pols,H. A. P.; Koes,B. W.	Preventive medicine	2007	Inappropriate outcomes
Chronic Pain, Overweight, and Obesity: Findings from a Community-Based Twin Registry.	Wright,L. J.; Schur,E.; Noonan,C.; Ahumada,S.; Buchwald,D.; Afari,N.	Journal of Pain	2010	Inappropriate outcomes
Plasma glucose concentration in symptomatic osteoarthritis: a clinical and epidemiological survey	Cimmino, M. A.; Cutolo, M.	Clinical & Experimental Rheumatology	1990	Inappropriate outcomes
Stress biomarkers' associations to pain in the neck, shoulder and back in healthy media workers: 12-month prospective follow-up	Schell, E.; Theorell, T.; Hasson, D.; Arnetz, B.; Saraste, H.	European Spine Journal	2008	Inappropriate outcomes
Comorbidity Cohort (2C) study: cardiovascular disease severity and comorbid osteoarthritis in primary care.	Prior, JA.; Rushton, CA.; Jordan, KP.; Kadam, UT.;	BMC Health Services Research	2012	Inappropriate outcomes
Painful knee but not hand osteoarthritis predicts excess mortality in a community-based cohort of middle-aged women with 23 years of follow-up	Kluzek, S.; Sanchez-Santos, M. T.; Leyland, K. M.; Judge, A.; Cooper, C.; Newton, J.; Arden, N. K.; Spector, T. D.; Hart, D.	Osteoporosis International	2015	Inappropriate outcomes
Painful knee but not hand osteoarthritis is an independent predictor of mortality over 23 years follow-up of a population-based cohort of middle-aged women	Kluzek, S.; Sanchez-Santos, MT.; Leyland, KM.; Judge, A.; Spector, TD.; Hart, D.; Cooper, C.; Newton, J.; Arden NK.;	Clinical and epidemiological research	2015	Inappropriate outcomes
The impact of musculoskeletal diseases on mortalityecomparison with internal diseases: A 15-year longitudinal study	Kasai, T.; Hasegawa, Y.; Imagama, S.; Sakai, T.; Wakai, K.; Suzuki, K.; Ishiguro, N.;	Journal of Orthopaedic science	2017	Inappropriate outcomes
Body mass index (BMI) and its longitudinal effect on disability and pain in persons with knee osteoarthritis (KOA)	Goggins, J.; Niu, J.; McLaughlin, S.; LaValley, M.; Li, W.; Gale, D.; Gale, M.; Felson, D.	Arthritis and Rheumatism	2002	Not available
Genetic and environmental influences on osteoarthritis	Charles, Susan Turk	Dissertation Abstracts International: Section B: The Sciences and Engineering	1998	Not available
Natural course of the medial knee osteoarthritis.	Omori,G.; Koga,Y.; Endo,K.; Hayami,T.; Watanabe,H.	Osteoarthritis and Cartilage	2009	Not available
RISK-FACTORS FOR CARDIOVASCULAR-DISEASE AND RADIOGRAPHIC FEATURES OF KNEE OSTEOARTHRITIS - DATA FROM THE BALTIMORE LONGITUDINAL-STUDY OF AGING	Martin, K.; Lethbridgeceiku, M.; Muller, D.; Elahi, D.; Andres, R.; Plato, C.; Tobin, J.; Hochberg, M.	Arthritis and Rheumatism	1995	Not available
Systemic bone mineral density change and body mass index, but not bone mineral density are related to knee cartilage loss in knee osteoarthritis	Lee, J. Y.; McAlindon, T. E.; Price, L. L.; Miller, E.	Arthritis and Rheumatism	2011	Not available
Obesity, gender, and in men, prior knee injuries are associated with incident symptomatic knee OA (SxKOA) in a high risk cohort: The multicenter osteoarthritis study (MOST)	Chang, M. T.; Lane, N.; Hietpas, J.; Felson, D. T.; Zhu, Y. Y.; Sharma, L.; Segal, N.; Curtis, J. R.; Nevitt, M.	Arthritis and Rheumatism	2006	Not available
Increased prevalence of haemostatic abnormalities and osteoarthritis in a young cohort of patients with coronary heart disease and mixed hyperlipidemia	Cheras, P. A.; Colquhoun, D. M.; Neilsen, G. V. L.; Dubois, P.; Outerbridge, H. K.; Battistutta, D.	Osteoporosis International	2003	Not available
Osteoarthritis is an independent risk factor for higher event rate of major adverse cardiovascular outcomes in hypertensive patients - from 15-year Taiwan NHIRD database	Syu, F. K.	Value in Health	2013	Not available
Is type 2 diabetes related to osteoarthritis? A mendelian randomisation study that investigates glycemic traits and osteoarthritis	Hoeven, T. A.; De Vries, P. S.; Dehghan, A.; Franco, O. H.; Hofman, A.; Bindels, P. J.; Bierma-Zeinstra, S. M.; Van Meurs, J. B.	Osteoarthritis and Cartilage	2014	Not available
Co-morbidities do not affect the progression of radiographic OA.	Dieppe,P.; Nuesch,E.; Reichenbach,S.; Juni,P.	Osteoarthritis and Cartilage	2010	Not available
The association between osteoarthritis and subsequent change in weight and muscle strength	Schapp, L.; Van Schoor, N.; Deeg, D.;	European Geriatric Medicine	2015	Not available
